# Supplementary material for: Power-to-protein: converting renewable electric power and carbon dioxide into single cell protein with a two-stage bioprocess
Source: Royal Society of Chemistry journal article supplement (doi:10.1039/c9ee02381j), 2019-01-01
Supplement: c9ee02381j1.pdf [file c9ee02381j1.pdf]

## Electronic Supplementary Information

### Supplementary Figures

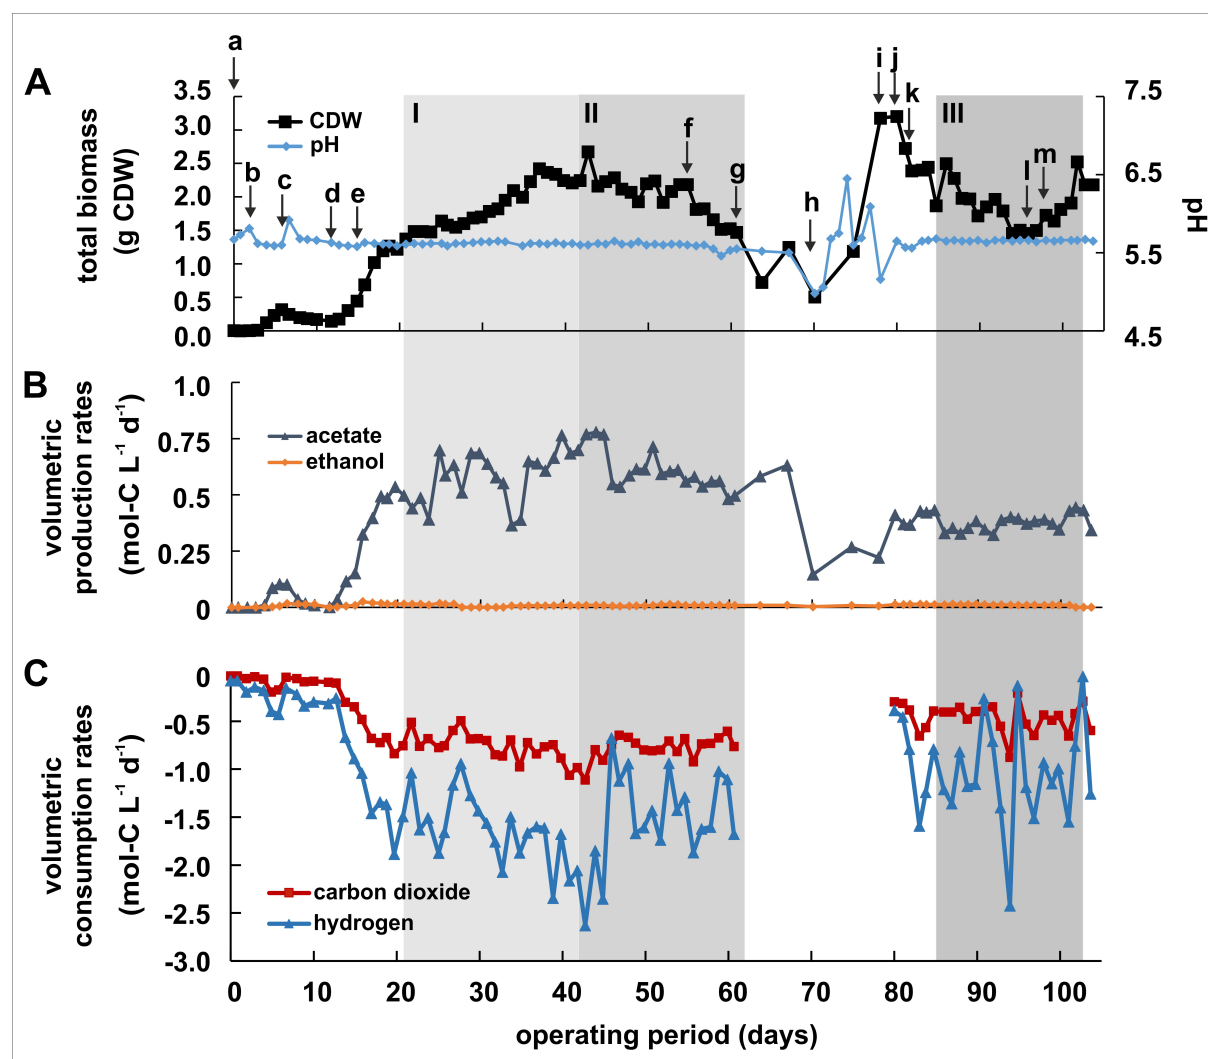

**Figure S1. Details on the performance of Stage A with *C. ljungdahlii*.** **A**, biomass concentration as grams cellular dry weight (CDW) and pH. **B**, production rates for acetate and ethanol in mol-C L<sup>-1</sup> d<sup>-1</sup>. **C**, consumption rates for carbon dioxide and hydrogen in mol-C L<sup>-1</sup> d<sup>-1</sup>. The grey areas labeled with I, II, and III indicate operating periods with batch or continuous feeding of Stage B (*S. cerevisiae*) with sterile-filtered Stage A effluent. Labels on the top of panel A indicate process changes and process perturbation: **a** (day 0), inoculate, batch, 200 rpm; **b** (day 2), re-inoculate, add 0.5 g L<sup>-1</sup> yeast extract; **c** (day 6), start cell recycling, start continuous, start Na<sub>2</sub>S feed; **d** (day 12), batch, keep cell recycling, no Na<sub>2</sub>S feed, add 0.5 g L<sup>-1</sup> yeast extract, 300 rpm; **e** (day 15), start continuous, start Na<sub>2</sub>S feed; **f** (day 55), switch feed to medium without Vitamin B<sub>12</sub> and folate; **g** (day 61), switch feed to medium with Vitamin B<sub>12</sub> and folate; **h** (day 70), bad pH probe; **i** (day 78), black precipitate accumulating; **j** (day 80), exchange pH probe, OD measurements after addition of HCl to dissolve black precipitate; **k** (day 82), re-inoculate; **l** (day 96) OD measurements without addition of HCl (measurements with and without HCl are similar again); **m** (day 98), switch feed to medium without Vitamin B<sub>12</sub> and folate.

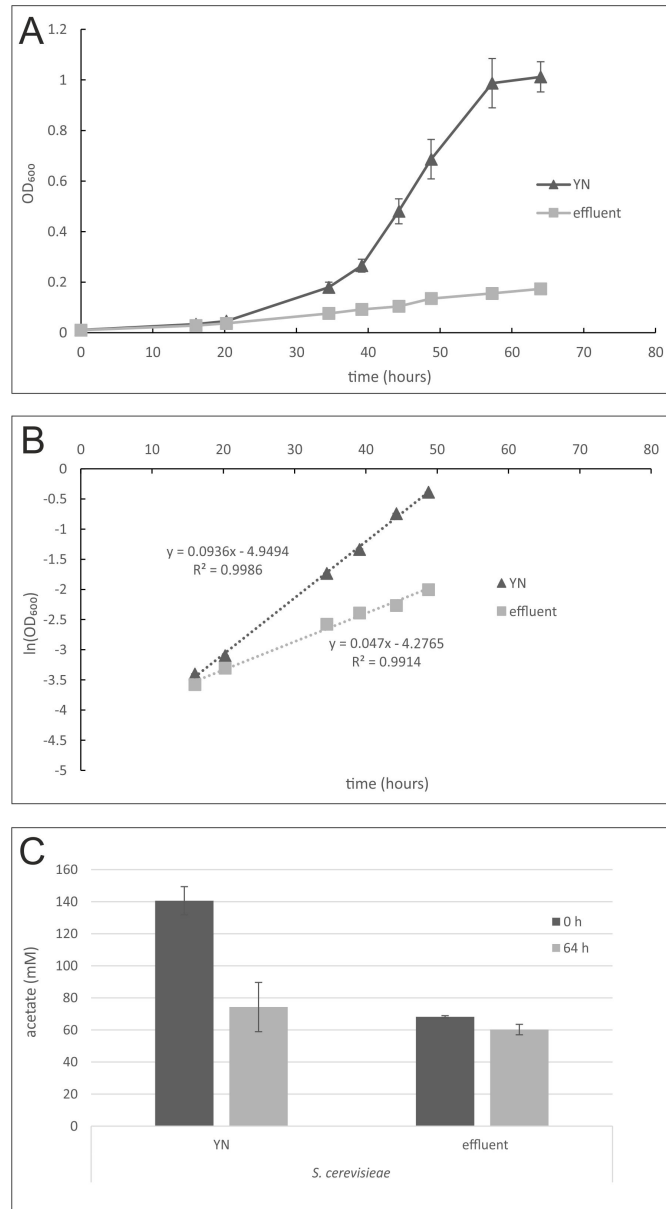

**Figure S2. Growth and acetate consumption data for flask experiments with *S. cerevisiae*.** **A**, cell concentrations given as OD<sub>600</sub> during the experimental period in YNA medium with a 150-mM acetate concentration (YN) and in gas-fermentation effluent with a 70-mM acetate concentration (effluent). **B**, determination of the growth rate by plotting the natural logarithm of the OD<sub>600</sub> during the exponential growth phase only. **C**, acetate concentration in the beginning (0 hours) and at the end (64 hours) of the experiment. Data is shown for biological triplicates. Error bars indicate standard errors.

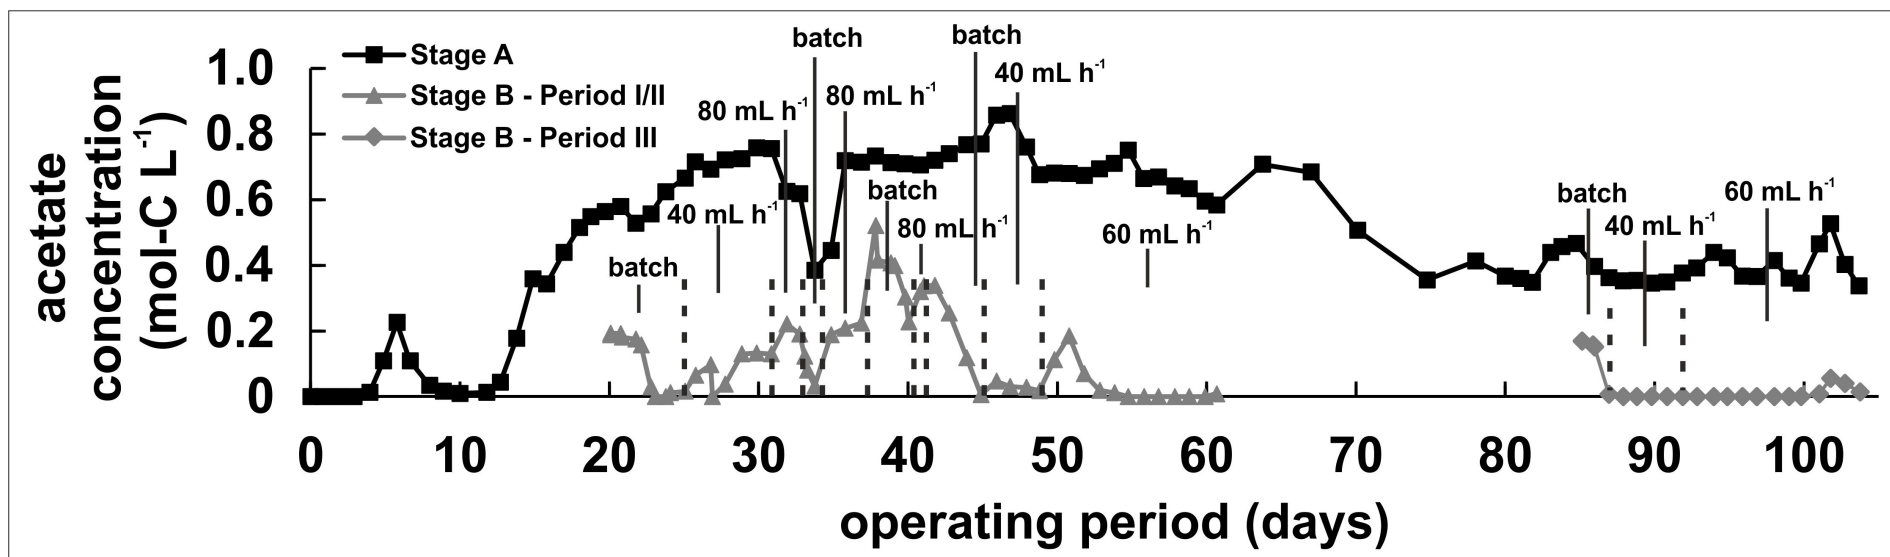

**Figure S3.** Acetate concentrations for Stage A (*C. ljungdahlii*) and Stage B (*S. cerevisiae*) during the continuous operating period of 104 days. Data is given in  $\text{mol-C L}^{-1}$ . For Stage B the flow rates of different operating periods are given.

## Supplementary Tables

**Table S1.** Protein measurements for stage B (*S. cerevisiae*). Data for three technical replicates is given.

| Operating period (days) | Dilution factor <sup>a</sup> | Concentration <sup>b</sup> (µg mL <sup>-1</sup> ) |      |      | Biomass concentration (g CDW L <sup>-1</sup> ) | Specific concentration (µg mg CDW <sup>-1</sup> ) |     |     |     |         | Dairy One <sup>c</sup> (µg mg CDW <sup>-1</sup> ) |
|-------------------------|------------------------------|---------------------------------------------------|------|------|------------------------------------------------|---------------------------------------------------|-----|-----|-----|---------|---------------------------------------------------|
|                         |                              | 1                                                 | 2    | 3    |                                                |                                                   | 1   | 2   | 3   | average |                                                   |
| Period I                |                              |                                                   |      |      |                                                |                                                   |     |     |     |         |                                                   |
| 26                      | 1                            | 1164                                              | 1086 | 1154 | 2.3                                            | 255                                               | 238 | 253 | 248 | 9.32    |                                                   |
| 27                      | 1                            | 1186                                              | 1220 | 1211 | 2.2                                            | 274                                               | 282 | 279 | 278 | 4.10    |                                                   |
| 28                      | 1                            | 1080                                              | 1017 | 939  | 2.2                                            | 247                                               | 232 | 215 | 231 | 16.1    |                                                   |
| 29                      | 1                            | 1070                                              | 1055 | 1055 | 1.8                                            | 290                                               | 286 | 286 | 288 | 2.45    |                                                   |
| 30                      | 1                            | 730                                               | 652  | 816  | 1.8                                            | 200                                               | 179 | 224 | 201 | 22.5    |                                                   |
| 31                      | 1                            | 930                                               | 948  | 725  | 1.8                                            | 265                                               | 270 | 206 | 247 | 35.3    |                                                   |
| 32                      | 1                            | 707                                               | 681  | 525  | 0.9                                            | 374                                               | 360 | 278 | 337 | 52.0    |                                                   |
| 33                      | 1                            | 834                                               | 798  | 765  | 1.0                                            | 413                                               | 395 | 378 | 395 | 17.2    |                                                   |
| 34                      | 1                            | 995                                               | 953  | 805  | 2.0                                            | 247                                               | 237 | 200 | 228 | 24.7    |                                                   |
| 35                      | 1                            | 740                                               | 821  | 797  | 1.0                                            | 387                                               | 429 | 417 | 411 | 21.6    |                                                   |
| 36                      | 1                            | 904                                               | 865  | 813  | 1.1                                            | 420                                               | 402 | 378 | 400 | 21.2    |                                                   |
| 37                      | 1                            | 745                                               | 429  | 756  | 1.0                                            | 361                                               | 208 | 366 | 312 | 90.1    |                                                   |
| 38                      | 1                            | 507                                               | 403  | 556  | 0.6                                            | 438                                               | 348 | 481 | 422 | 67.6    |                                                   |
| 39                      | 1                            | 250                                               | 276  | 268  | 0.2                                            | 536                                               | 592 | 575 | 568 | 28.6    |                                                   |
| 41                      | 1                            | 445                                               | 377  | 391  | 0.4                                            | 579                                               | 491 | 509 | 526 | 46.4    |                                                   |
| Period II               |                              |                                                   |      |      |                                                |                                                   |     |     |     |         |                                                   |
| 42                      | 1                            | 259                                               | 212  | 202  | 0.2                                            | 557                                               | 456 | 434 | 482 | 65.7    |                                                   |
| 43                      | 1                            | 387                                               | 317  | 128  | 0.3                                            | 730                                               | 597 | 241 | 523 | 253     |                                                   |
| 44                      | 2                            | 1516                                              | 1462 | 1658 | 1.9                                            | 398                                               | 383 | 435 | 405 | 26.5    |                                                   |

|            |   |      |      |      |     |     |     |     |     |      |     |
|------------|---|------|------|------|-----|-----|-----|-----|-----|------|-----|
| 45         | 2 | 1476 | 1853 | 1610 | 2.5 | 301 | 378 | 328 | 336 | 39.0 |     |
| 46         | 2 | 1840 | 1995 | 2022 | 2.4 | 386 | 419 | 424 | 410 | 20.6 |     |
| 47         | 2 | 1920 | 1698 | 2183 | 2.6 | 364 | 321 | 413 | 366 | 46.0 | 421 |
| 48         | 2 | 2156 | 2197 | 1873 | 2.6 | 420 | 428 | 365 | 404 | 34.4 |     |
| 49         | 2 | 1725 | 2244 | 2210 | 2.7 | 324 | 421 | 415 | 387 | 54.5 |     |
| 50         | 1 | 1428 | 1337 | 1434 | 2.3 | 315 | 295 | 317 | 309 | 11.9 |     |
| 51         | 1 | 1356 | 1350 | 1350 | 1.7 | 393 | 392 | 392 | 392 | 1.01 |     |
| 52         | 1 | 1901 | 2097 | 2007 | 2.4 | 388 | 429 | 410 | 409 | 20.0 | 544 |
| 53         | 2 | 2675 | 2789 | 2572 | 3.0 | 443 | 462 | 426 | 444 | 18.0 | 534 |
| 54         | 2 | 2699 | 2765 | 2771 | 3.3 | 406 | 416 | 417 | 413 | 6.04 | 547 |
| 55         | 2 | 2795 | 2916 | 2922 | 3.4 | 409 | 426 | 427 | 421 | 10.4 | 541 |
| 56         | 2 | 2576 | 2908 | 1730 | 3.2 | 399 | 451 | 268 | 373 | 94.2 |     |
| 57         | 2 | 2410 | 2747 | 2041 | 3.1 | 392 | 447 | 332 | 390 | 57.5 |     |
| 58         | 2 | 2456 | 2623 | 2472 | 3.2 | 378 | 404 | 381 | 388 | 14.1 | 547 |
| 59         | 2 | 2353 | 2612 | 2825 | 3.0 | 392 | 436 | 471 | 433 | 39.5 | 544 |
| 60         | 2 | 2711 | 2675 | 2654 | 2.9 | 474 | 468 | 464 | 469 | 5.06 | 554 |
| 61         | 2 | 2420 | 2223 | 2420 | 2.7 | 442 | 406 | 442 | 430 | 20.8 | 568 |
| Period III |   |      |      |      |     |     |     |     |     |      |     |
| 90         | 1 | 1072 | 1182 | 1192 | 1.2 | 462 | 509 | 514 | 495 | 28.5 | 571 |
| 91         | 1 | 1109 | 1096 | 1119 | 1.1 | 487 | 481 | 491 | 486 | 5.14 |     |
| 92         | 1 | 1091 | 1052 | 1166 | 1.1 | 479 | 462 | 512 | 484 | 25.5 |     |
| 93         | 1 | 1259 | 1351 | 1341 | 1.8 | 359 | 385 | 382 | 375 | 14.5 |     |
| 94         | 1 | 1194 | 1447 | 1387 | 1.4 | 430 | 521 | 500 | 484 | 47.6 |     |
| 95         | 1 | 1408 | 1284 | 1346 | 2.0 | 350 | 319 | 334 | 334 | 15.4 | 534 |
| 96         | 1 | 1369 | 1423 | 1305 | 1.7 | 393 | 408 | 374 | 392 | 17.0 | 543 |
| 97         | 1 | 1274 | 1478 | 1354 | 1.7 | 384 | 446 | 408 | 413 | 30.9 | 557 |
| 98         | 1 | 1313 | 1380 | 1390 | 1.6 | 415 | 436 | 439 | 430 | 13.3 | 559 |
| 99         | 1 | 1315 | 1364 | 1367 | 1.7 | 377 | 391 | 392 | 387 | 8.33 |     |
| 100        | 1 | 1256 | 1264 | 1279 | 1.7 | 367 | 369 | 374 | 370 | 3.45 |     |

|            |   |      |      |      |     |     |     |     |     |      |     |
|------------|---|------|------|------|-----|-----|-----|-----|-----|------|-----|
| <b>101</b> | 1 | 1508 | 1470 | 1449 | 1.8 | 415 | 404 | 398 | 406 | 8.27 | 597 |
| <b>102</b> | 1 | 1351 | 1354 | 1323 | 1.4 | 480 | 480 | 470 | 477 | 6.09 | 596 |
| <b>103</b> | 1 | 1635 | 1735 | 1604 | 1.5 | 535 | 568 | 525 | 543 | 22.4 |     |
| <b>104</b> | 1 | 1741 | 1732 | 1782 | 1.8 | 473 | 471 | 484 | 476 | 7.21 |     |

<sup>a</sup> the necessary dilution was determined in a pre-measurement. The triplicate measurement was conducted with no dilution (1) or with a 1:2 dilution (2) to stay within measurement range of our standard curve; <sup>b</sup> 2 mL samples were collected from the bioreactor, pelleted, and resuspended/stored in 1 mL 1 M NaOH. The concentration given here is referred to 1 mL NaOH; <sup>c</sup> biomass from stage B was collected over a period of one day, pelleted, dried, and analyzed by Dairy One Co-op for crude protein content. When the amount of dried biomass was not enough to conduct a separate crude protein analysis, samples were combined, and the measurement given is an average of the combined samples; <sup>d</sup> SD, standard deviation.

**Table S2.** Data used for economic calculations, including calculations, explanation of assumptions, and references for an existing Quorn™ process facility of 310,000 L operated by Marlow Foods Ltd.

| Variable used in equations                            | Parameter                                              | Value                                    | Calculation (Variables in bold)                | Assumptions                                                                                                                                  | Reference |
|-------------------------------------------------------|--------------------------------------------------------|------------------------------------------|------------------------------------------------|----------------------------------------------------------------------------------------------------------------------------------------------|-----------|
| <b>General considerations for 2014 Quorn™ process</b> |                                                        |                                          |                                                |                                                                                                                                              |           |
| <b>a</b>                                              | Quorn™ II Volume                                       | 155 m <sup>3</sup>                       |                                                |                                                                                                                                              | 1,2       |
| <b>b</b>                                              | Quorn™ III Volume                                      | 155 m <sup>3</sup>                       |                                                |                                                                                                                                              | 1,2       |
| <b>c</b>                                              | Quorn™ total Volume 2014                               | 310 m <sup>3</sup>                       | <b>a + b</b>                                   |                                                                                                                                              | 1,2       |
| <b>d</b>                                              | Vol. Prod. Rate DW protein                             | 1.25 g·L <sup>-1</sup> ·h <sup>-1</sup>  |                                                | We assume an average production rate given from the cited reference                                                                          | 1         |
| <b>e</b>                                              | Vol. Prod. Rate DW protein                             | 1.25 kg·m <sup>-3</sup> ·h <sup>-1</sup> | <b>d</b> ·(1kg/1000g)·(1000L/1m <sup>3</sup> ) |                                                                                                                                              |           |
| <b>f</b>                                              | Loss in protein to reduce RNA content                  | 0.3                                      |                                                |                                                                                                                                              | 1,2       |
| <b>g</b>                                              | Plant run-time efficiency                              | 0.9                                      |                                                | The process is operated for 6 weeks in continuous mode and then restarted with some down-time (~8 runs per year with each ~4 days down-time) | 1         |
| <b>h</b>                                              | Kilograms protein per kilogram biomass                 | 0.44 kg·kg <sup>-1</sup>                 |                                                |                                                                                                                                              | 1         |
| <b>i</b>                                              | Total DW protein produced per year                     | 3055050 kg·yr <sup>-1</sup>              | <b>c</b> · <b>e</b> · <b>g</b> ·(8760h/1yr)    |                                                                                                                                              |           |
| <b>j</b>                                              | Total DW protein produced per year after RNA reduction | 2138535 kg·yr <sup>-1</sup>              | <b>i</b> ·(1- <b>f</b> )                       |                                                                                                                                              |           |
| <b>k</b>                                              | Quorn™ Supermarket price per kg protein                | 150 \$·kg <sup>-1</sup>                  |                                                | Sourced in German supermarket (www.rewe.de) in May 2019, converted with daily euro-to-dollar conversion rate in 2019                         |           |
| <b>l</b>                                              | Total revenue calc. from supermarket price in 2019     | 320,780,250 \$                           | <b>j</b> · <b>k</b>                            | <b>l</b> > <b>n</b>                                                                                                                          |           |
| <b>m</b>                                              | Total revenue reported in 2014 (£)                     | 150,300,000 £                            |                                                |                                                                                                                                              | 3         |
| <b>n</b>                                              | Total revenue reported in 2014 (\$)                    | 247,637,694 \$                           | <b>m</b> ·(1.648\$/£)                          | Average conversion rate £ to \$ in 2014                                                                                                      | 4         |
| <b>o</b>                                              | Value ratio increase supermarket                       | 30%                                      | ( <b>l</b> - <b>n</b> )/ <b>n</b>              |                                                                                                                                              |           |
| <b>p</b>                                              | Dietary requirement of protein per                     | 0.056 kg·d <sup>-1</sup>                 |                                                | Average person with 70 kg body                                                                                                               | 5         |

|                                                                                                                            |                                                                         |                           |                                      |                                                           |              |
|----------------------------------------------------------------------------------------------------------------------------|-------------------------------------------------------------------------|---------------------------|--------------------------------------|-----------------------------------------------------------|--------------|
|                                                                                                                            | person                                                                  |                           |                                      | weight                                                    |              |
| <b>q</b>                                                                                                                   | How many persons can be fed per day?                                    | 105,000 d <sup>-1</sup>   | $j \cdot (1\text{yr}/365\text{d})/p$ |                                                           |              |
| <b>r</b>                                                                                                                   | One person spends how much daily?                                       | 8.40 \$·d <sup>-1</sup>   | <b>k·p</b>                           |                                                           |              |
| <b>s</b>                                                                                                                   | How many persons can be fed per day after 10x scale-up?                 | 1,050,000 d <sup>-1</sup> | <b>q·10</b>                          |                                                           |              |
| <b>t</b>                                                                                                                   | How many 10x scaled-up plants are required to feed 10 billion people?   | 9558                      | $10 \cdot 10^9/s$                    | Assuming 10 billion people by 2050                        |              |
| <b>General considerations for 2010 Quorn™ process</b>                                                                      |                                                                         |                           |                                      |                                                           |              |
| <b>u</b>                                                                                                                   | Total revenue reported in 2010 (£)                                      | 128,800,000 £             |                                      |                                                           | <sup>6</sup> |
| <b>v</b>                                                                                                                   | Profit reported in 2010 (£)                                             | 16,100,000 £              |                                      |                                                           | <sup>6</sup> |
| <b>w</b>                                                                                                                   | Employees reported in 2010                                              | 600                       |                                      |                                                           | <sup>6</sup> |
| <b>TOT1</b>                                                                                                                | Profit ratio                                                            | 12.50%                    | <b>v/u</b>                           |                                                           |              |
| <b>General considerations for 1997 Quorn™ process</b>                                                                      |                                                                         |                           |                                      |                                                           |              |
| <b>x</b>                                                                                                                   | Total revenue reported in 1997 (£)                                      | 74,000,000 £              |                                      |                                                           | <sup>6</sup> |
| <b>y</b>                                                                                                                   | Reported investment for fermenters in 1997                              | 75,000,000 £              |                                      |                                                           | <sup>6</sup> |
|                                                                                                                            | Ratio of revenue to investment                                          | 99%                       | $(x/y) \cdot 100$                    |                                                           |              |
| <b>Calculations on Quorn™ process in 2014 – comparing implemented Quorn™ process and hypothetical two-stage bioprocess</b> |                                                                         |                           |                                      |                                                           |              |
| <b>z</b>                                                                                                                   | Value of £ in 2014 (162.56 £) vs. 1997 (100 £)                          | 1.6256                    | 162.56£/100£                         |                                                           | <sup>7</sup> |
| <b>A</b>                                                                                                                   | Investment cost of 1997 fermenter in 2014 (£)                           | 121,920,000 £             | <b>y·z</b>                           |                                                           |              |
| <b>B</b>                                                                                                                   | Investment cost of 1997 fermenter in 2014 (\$)                          | 200,878,162 \$            | <b>A·(1.648\$/£)</b>                 | Average conversion rate £ to \$ in 2014                   | <sup>4</sup> |
| <b>C</b>                                                                                                                   | Investment cost for the two-stage bioprocess                            | 401,756,324 \$            | <b>B·2</b>                           | Double investment cost for similar-sized second fermenter |              |
| <b>D</b>                                                                                                                   | Weighted average cost of capital for UK food/beverage industry per year | 8%                        |                                      |                                                           | <sup>8</sup> |
| <b>E</b>                                                                                                                   | Capital cost per year for Quorn™ process                                | 16,070,253 \$             | <b>B·D</b>                           |                                                           |              |
| <b>F</b>                                                                                                                   | Capital cost per year for two-stage bioprocess                          | 32,140,506 \$             | <b>C·D</b>                           |                                                           |              |
| <b>TOT2</b>                                                                                                                | Capital cost ratio vs. revenue (Quorn™ process)                         | 6.49%                     | $(E/n) \cdot 100$                    |                                                           |              |



|             |                                                                                       |                                          |                                                              |                                                                                                                                                                                   |               |
|-------------|---------------------------------------------------------------------------------------|------------------------------------------|--------------------------------------------------------------|-----------------------------------------------------------------------------------------------------------------------------------------------------------------------------------|---------------|
|             | Capital cost ratio vs. revenue (two-stage bioprocess)                                 | 12.98%                                   | $(F/n) \cdot 100$                                            |                                                                                                                                                                                   |               |
| <b>G</b>    | Average cost per employee per year                                                    | 90,949 \$·yr <sup>-1</sup>               |                                                              | Based on 27,600 £ average salary in UK in 2015, converted with average conversion rate ( <b>B</b> ); doubled to include additional cost for employer (insurance, health, pension) | <sup>9</sup>  |
| <b>H</b>    | Labor cost per year (Quorn <sup>TM</sup> process)                                     | 54,569,264 \$·yr <sup>-1</sup>           | <b>w·G</b>                                                   | Number of employees similar as in 2010                                                                                                                                            |               |
| <b>I</b>    | Labor cost per year (two-stage bioprocess)                                            | 57,297,728 \$·yr <sup>-1</sup>           | <b>H+(H·5%)</b>                                              | 5% more employees (30) for second fermenter                                                                                                                                       |               |
| <b>TOT3</b> | Labor cost ratio vs. revenue (Quorn <sup>TM</sup> process)                            | 22.04%                                   | $(H/n) \cdot 100$                                            |                                                                                                                                                                                   |               |
|             | Labor cost ratio vs. revenue (two-stage bioprocess)                                   | 23.14%                                   | $(I/n) \cdot 100$                                            |                                                                                                                                                                                   |               |
| <b>J</b>    | DW protein yield per kg of glucose                                                    | 0.136 kg·kg <sup>-1</sup>                |                                                              | This value includes that for DW protein production carbon also is “lost” as other biomass components and CO <sub>2</sub>                                                          | <sup>6</sup>  |
| <b>K</b>    | Glucose price                                                                         | 0.37 \$·kg <sup>-1</sup>                 |                                                              |                                                                                                                                                                                   | <sup>10</sup> |
| <b>L</b>    | Glucose cost per year in Quorn <sup>TM</sup> process                                  | 8,311,533 \$                             | <b>i/J·K</b>                                                 |                                                                                                                                                                                   |               |
| <b>TOT4</b> | Glucose cost ratio vs. revenue (Quorn <sup>TM</sup> process)                          | 3.36%                                    | $(L/n) \cdot 100$                                            |                                                                                                                                                                                   |               |
| <b>M</b>    | Kilogram Ammonia required per DW protein                                              | 0.33 kg·kg <sup>-1</sup>                 | $0.27/(14\text{g-N/mol}) \cdot (17\text{g-NH}_3/\text{mol})$ | Based on average nitrogen content of dry biomass (0.12 kg/kg) and a protein content of 44% (kg/kg). This gives 0.27 kg-N/kg-DW protein                                            | <sup>11</sup> |
| <b>N</b>    | Ammonia price                                                                         | 0.53 \$·kg <sup>-1</sup>                 |                                                              |                                                                                                                                                                                   | <sup>12</sup> |
| <b>O</b>    | Ammonia cost per year in Quorn <sup>TM</sup> process                                  | 530,859 \$                               | <b>i/M·N</b>                                                 |                                                                                                                                                                                   |               |
| <b>TOT5</b> | Ammonia cost ratio vs. revenue (Quorn <sup>TM</sup> process and two-stage bioprocess) | 0.21%                                    | $(O/n) \cdot 100$                                            |                                                                                                                                                                                   |               |
| <b>P</b>    | Biotin required per DW protein                                                        | $1.36 \cdot 10^{-6}$ kg·kg <sup>-1</sup> |                                                              |                                                                                                                                                                                   | <sup>1</sup>  |

|             |                                                                                      |                                           |                         |                                                                                                                                                                                                 |                |
|-------------|--------------------------------------------------------------------------------------|-------------------------------------------|-------------------------|-------------------------------------------------------------------------------------------------------------------------------------------------------------------------------------------------|----------------|
| <b>Q</b>    | Biotin price                                                                         | 2000 \$·kg <sup>-1</sup>                  |                         |                                                                                                                                                                                                 | <sup>13</sup>  |
| <b>R</b>    | Biotin cost per year in Quorn <sup>TM</sup> process                                  | 8,310 \$                                  | <b>i/P·Q</b>            |                                                                                                                                                                                                 |                |
| <b>TOT6</b> | Biotin cost ratio vs. revenue (Quorn <sup>TM</sup> process and two-stage bioprocess) | 0.00%                                     | <b>(R/n)·100</b>        |                                                                                                                                                                                                 |                |
| <b>S</b>    | Magnesium required per DW protein                                                    | 4.20·10 <sup>-3</sup> kg·kg <sup>-1</sup> |                         |                                                                                                                                                                                                 | <sup>1</sup>   |
| <b>T</b>    | Magnesium price                                                                      | 8.55 \$·kg <sup>-1</sup>                  |                         |                                                                                                                                                                                                 | <sup>14</sup>  |
| <b>U</b>    | Magnesium cost per year in Quorn <sup>TM</sup> process                               | 109,707 \$                                | <b>i/S·T</b>            |                                                                                                                                                                                                 |                |
| <b>TOT7</b> | Magnesium cost ratio vs. revenue (Quorn process and two-stage bioprocess)            | 0.04%                                     | <b>(U/n)·100</b>        |                                                                                                                                                                                                 |                |
| <b>V</b>    | Dilution rate in Quorn <sup>TM</sup> process per hour                                | 0.19 h <sup>-1</sup>                      |                         |                                                                                                                                                                                                 | <sup>2,6</sup> |
| <b>W</b>    | Exchanges of reactor volume per day (dilution rate per day)                          | 4.56 d <sup>-1</sup>                      | <b>V·(24h/1d)</b>       |                                                                                                                                                                                                 |                |
| <b>X</b>    | Water usage per year without recycling                                               | 464,368 m <sup>3</sup> ·yr <sup>-1</sup>  | <b>W·c·g·(365d/1yr)</b> |                                                                                                                                                                                                 |                |
| <b>Y</b>    | Recycling rate                                                                       | 50%                                       |                         | Similar to corn-to-ethanol industry                                                                                                                                                             | <sup>15</sup>  |
| <b>Z</b>    | Water usage per year with recycling                                                  | 232,184 m <sup>3</sup> ·yr <sup>-1</sup>  | <b>X·Y</b>              |                                                                                                                                                                                                 |                |
| <b>a1</b>   | Water cost                                                                           | 2.01 \$·m <sup>-3</sup>                   |                         | Location of Marlow foods<br>( <a href="https://www.google.com/maps/search/marlow+foods/@54.522888,-1.497877,10z">https://www.google.com/maps/search/marlow+foods/@54.522888,-1.497877,10z</a> ) | <sup>16</sup>  |
| <b>b1</b>   | Water cost per year                                                                  | 466,628 \$·yr <sup>-1</sup>               | <b>Z·a1</b>             |                                                                                                                                                                                                 |                |
| <b>TOT8</b> | Water cost ratio vs. revenue (Quorn <sup>TM</sup> process)                           | 0.19%                                     | <b>(b1/n)·100</b>       |                                                                                                                                                                                                 |                |
| <b>c1</b>   | Water to wastewater                                                                  | 50%                                       |                         |                                                                                                                                                                                                 |                |
| <b>d1</b>   | Wastewater cost                                                                      | 1.74 \$·m <sup>-3</sup>                   |                         | Location of Marlow foods<br>( <a href="https://www.google.com/maps/search/marlow+foods/@54.522888,-1.497877,10z">https://www.google.com/maps/search/marlow+foods/@54.522888,-1.497877,10z</a> ) | <sup>16</sup>  |
| <b>e1</b>   | Wastewater cost per year                                                             | 201,670 \$·yr <sup>-1</sup>               | <b>Z·c1·d1</b>          |                                                                                                                                                                                                 |                |
| <b>TOT9</b> | Wastewater cost ratio vs. revenue (Quorn <sup>TM</sup> process)                      | 0.08%                                     | <b>(e1/n)·100</b>       |                                                                                                                                                                                                 |                |
| <b>f1</b>   | Glucose used per year                                                                | 22,463,603 kg·yr <sup>-1</sup>            | <b>i/J</b>              |                                                                                                                                                                                                 |                |

|              |                                                                               |                                                          |                                                                                                                                                                                   |                                                                                                                                                                                                                                                                       |               |
|--------------|-------------------------------------------------------------------------------|----------------------------------------------------------|-----------------------------------------------------------------------------------------------------------------------------------------------------------------------------------|-----------------------------------------------------------------------------------------------------------------------------------------------------------------------------------------------------------------------------------------------------------------------|---------------|
| <b>g1</b>    | Millimoles glucose per hour                                                   | 14,233,987<br>$\text{mmol}\cdot\text{h}^{-1}$            | $\mathbf{f1}\cdot(1\text{yr}/8760\text{h})/$<br>$(180.156\text{g}\cdot\text{mol}^{-1})\cdot(1000\text{g}/\text{kg})\cdot$<br>$(1000\text{mmol}/\text{mol})$                       |                                                                                                                                                                                                                                                                       |               |
| <b>h1</b>    | Millimoles oxygen per Liter per hour needed for aeration without electrolyzer | 275.49<br>$\text{mmol}\cdot(\text{L}\cdot\text{h})^{-1}$ | $\mathbf{g1}\cdot 6/\mathbf{c}\cdot(1\text{m}^3/1000\text{L})$                                                                                                                    | Stoichiometric need of 6 moles oxygen per 1 mole glucose                                                                                                                                                                                                              |               |
| <b>i1</b>    | Kilograms oxygen per year                                                     | 23,940,428 $\text{kg}\cdot\text{yr}^{-1}$                | $\mathbf{f1}\cdot(1000\text{mmol}/\text{mol})$<br>$/ (180.156\text{g}\cdot\text{mol}^{-1})$<br>$\cdot 6\cdot(32\text{g}\cdot\text{mol}^{-1})$<br>$\cdot(1\text{kg}/1000\text{g})$ |                                                                                                                                                                                                                                                                       |               |
| <b>j1</b>    | Power to deliver oxygen to reactor per kg                                     | 2.75 $\text{kWh}\cdot\text{kg}^{-1}$                     |                                                                                                                                                                                   | Extrapolated from data given Figure 3 in reference                                                                                                                                                                                                                    | <sup>17</sup> |
| <b>k1</b>    | Power for aeration of reactor per year                                        | $6.58\cdot 10^7 \text{ kWh}\cdot\text{yr}^{-1}$          | <b>i1·j1</b>                                                                                                                                                                      |                                                                                                                                                                                                                                                                       |               |
|              | Amount of overall electric power in process used for aeration                 | 50%                                                      |                                                                                                                                                                                   | Similar to wastewater industry                                                                                                                                                                                                                                        | <sup>18</sup> |
| <b>l1</b>    | Power for other pumping, etc.                                                 | $6.58\cdot 10^7 \text{ kWh}\cdot\text{yr}^{-1}$          |                                                                                                                                                                                   | Same as for aeration, due to assumption that this is 50% of overall electric power needs                                                                                                                                                                              |               |
| <b>m1</b>    | Whole sale kWh cost in UK in 2014                                             | 0.07 \$·kWh                                              |                                                                                                                                                                                   |                                                                                                                                                                                                                                                                       | <sup>19</sup> |
| <b>n1</b>    | Electricity cost per year for Quorn <sup>TM</sup> process                     | 9,330,830 $\text{\$}\cdot\text{yr}^{-1}$                 | <b>(k1+l1)·m1</b>                                                                                                                                                                 |                                                                                                                                                                                                                                                                       |               |
| <b>o1</b>    | Millimoles oxygen per Liter per hour with oxygen from electrolyzer present    | 142.39<br>$\text{mmol}\cdot(\text{L}\cdot\text{h})^{-1}$ | <b>h1-</b><br><b>(C1/2)·(1000mmol/</b><br><b>mol)/c·(1000L/m<sup>3</sup>)</b>                                                                                                     | Offset by pressurized oxygen from electrolyzer; per two moles of H <sub>2</sub> one mole of O <sub>2</sub> is produced; the stoichiometric need of O <sub>2</sub> for the combustion is the same for glucose and acetate because carbon has the same oxidation number |               |
| <b>p1</b>    | Power to deliver oxygen to reactor per kg with electrolyzer                   | 2.3 $\text{kWh}\cdot\text{kg}^{-1}$                      |                                                                                                                                                                                   | From data given Figure 3 in reference                                                                                                                                                                                                                                 | <sup>17</sup> |
| <b>q1</b>    | Power for aeration of reactor per year with electrolyzer                      | $5.51\cdot 10^7 \text{ kWh}\cdot\text{yr}^{-1}$          | <b>i1·p1</b>                                                                                                                                                                      |                                                                                                                                                                                                                                                                       |               |
| <b>r1</b>    | Electricity cost per year with electrolyzer                                   | 8,567,398 $\text{\$}\cdot\text{yr}^{-1}$                 | <b>(l1+q1)·m1</b>                                                                                                                                                                 |                                                                                                                                                                                                                                                                       |               |
| <b>TOT10</b> | Electricity cost ratio vs. revenue (Quorn <sup>TM</sup> process)              | 3.77%                                                    | <b>(n1/n)·100</b>                                                                                                                                                                 |                                                                                                                                                                                                                                                                       |               |
|              | Electricity cost ratio vs. revenue (two-                                      | 3.46%                                                    | <b>(r1/n)·100</b>                                                                                                                                                                 | Offset by oxygen from electrolyzer                                                                                                                                                                                                                                    |               |

|           |                                                                             |                                        |                                               |                                                                                                                                                                                                                                                |                                                           |
|-----------|-----------------------------------------------------------------------------|----------------------------------------|-----------------------------------------------|------------------------------------------------------------------------------------------------------------------------------------------------------------------------------------------------------------------------------------------------|-----------------------------------------------------------|
|           | stage bioprocess                                                            |                                        |                                               |                                                                                                                                                                                                                                                |                                                           |
| <b>s1</b> | Kilograms carbon per kilogram protein                                       | 1.16 kg·kg <sup>-1</sup>               |                                               | Based on average carbon content of dry biomass (0.51 kg/kg) and a protein content of 44% (kg/kg)                                                                                                                                               | <sup>11</sup>                                             |
| <b>t1</b> | Carbon required for protein product produced per year                       | 3,543,858 kg·yr <sup>-1</sup>          | <b>i·s1</b>                                   |                                                                                                                                                                                                                                                |                                                           |
| <b>u1</b> | Moles of carbon per year                                                    | 295,321,500 mol·yr <sup>-1</sup>       | <b>t1/(12g/mol)·(1000g/1kg)</b>               |                                                                                                                                                                                                                                                |                                                           |
| <b>v1</b> | Moles of acetate required for protein production                            | 147,660,750 mol·yr <sup>-1</sup>       | <b>u1/2</b>                                   | 2 moles carbon per acetate                                                                                                                                                                                                                     |                                                           |
| <b>w1</b> | Carbon yield in gas fermentation                                            | 81.7%                                  |                                               | Observation from this manuscript                                                                                                                                                                                                               |                                                           |
| <b>x1</b> | Moles of CO <sub>2</sub> required for gas fermentation per year             | 361,470,624 mol·yr <sup>-1</sup>       | <b>v1·2/w1</b>                                | 2 moles CO <sub>2</sub> per acetate                                                                                                                                                                                                            |                                                           |
| <b>y1</b> | Kilogram of CO <sub>2</sub> required for gas fermentation per year          | 15,904,707 kg·yr <sup>-1</sup>         | <b>x1·(44g/mol)·(1000g/1kg)</b>               |                                                                                                                                                                                                                                                |                                                           |
| <b>z1</b> | CO <sub>2</sub> cost                                                        | 0.16 \$·kg <sup>-1</sup>               |                                               | Independent on how carbon taxes may influence the cost or cost benefit of utilizing CO <sub>2</sub> , there will be a cost for CO <sub>2</sub> transportation infrastructure or shipping, therefore, we used a very conservative estimate here | <sup>20,21</sup>                                          |
| <b>A1</b> | CO <sub>2</sub> cost per year                                               | 2,544,753 \$·yr <sup>-1</sup>          | <b>y1·z1</b>                                  |                                                                                                                                                                                                                                                |                                                           |
|           | CO <sub>2</sub> cost ratio vs. revenue (two-stage bioprocess)               | 1.03%                                  | <b>(A1/n)·100</b>                             |                                                                                                                                                                                                                                                |                                                           |
| <b>B1</b> | Moles H <sub>2</sub> required for gas fermentation per year                 | 722,941,249 mol·yr <sup>-1</sup>       | <b>x1·2</b>                                   | Stoichiometric ratio of 2 moles of H <sub>2</sub> per 1 mole of CO <sub>2</sub> in acetogenesis                                                                                                                                                | <sup>22</sup>                                             |
| <b>C1</b> | Moles H <sub>2</sub> required for gas fermentation per hour                 | 82,528 mol·h <sup>-1</sup>             | <b>B1·(1yr/8760h)</b>                         |                                                                                                                                                                                                                                                |                                                           |
| <b>D1</b> | Normal cubic meter H <sub>2</sub> required per hour                         | 1,849 Nm <sup>3</sup> ·h <sup>-1</sup> | <b>C1·(22.4L/mol)·(1Nm<sup>3</sup>/1000L)</b> | 22.4 L·mol <sup>-1</sup> of a gas under normal conditions                                                                                                                                                                                      |                                                           |
| <b>E1</b> | Normal cubic meter H <sub>2</sub> produced from 1 MWh electrolyzer per hour | 200 Nm <sup>3</sup> ·h <sup>-1</sup>   |                                               |                                                                                                                                                                                                                                                | <sup>23</sup> , Electrochaea LLC (personal communication) |
| <b>F1</b> | Required electrolyzer capacity                                              | 9.24 MWh                               | <b>D1/E1</b>                                  |                                                                                                                                                                                                                                                |                                                           |
| <b>G1</b> | Electrolyzer cost 1-10 MW per MW                                            | 1,000,000 \$·MW <sup>-1</sup>          |                                               |                                                                                                                                                                                                                                                | Electrochaea LLC (personal                                |

|                                                                                              |                                                                                                       |                               |                                 |  |               |
|----------------------------------------------------------------------------------------------|-------------------------------------------------------------------------------------------------------|-------------------------------|---------------------------------|--|---------------|
|                                                                                              |                                                                                                       |                               |                                 |  | communication |
| <b>H1</b>                                                                                    | Capital cost for electrolyzer                                                                         | 9,243,084 \$                  | <b>F1·G1</b>                    |  |               |
| <b>I1</b>                                                                                    | Capital cost for electrolyzer per year (two-stage bioprocess)                                         | 739,447 \$                    | <b>H1·D</b>                     |  |               |
|                                                                                              | Capital cost electrolyzer ratio vs. revenue (two-stage bioprocess)                                    | 0.30%                         | <b>(I1/n)·100</b>               |  |               |
| <b>J1</b>                                                                                    | Electricity required to operate electrolyzer                                                          | 9243 kWh                      | <b>F1·(1000kWh/1MWh)</b>        |  |               |
| <b>K1</b>                                                                                    | Cost to operate electrolyzer per hour                                                                 | 655.00 \$·h <sup>-1</sup>     | <b>J1·m1</b>                    |  |               |
| <b>L1</b>                                                                                    | Cost to operate electrolyzer per year                                                                 | 5,737,817 \$·yr <sup>-1</sup> | <b>K1·(8760h/1yr)</b>           |  |               |
|                                                                                              | Operation cost electrolyzer ratio vs. revenue (two-stage bioprocess)                                  | 2.32%                         | <b>(L1/n)·100</b>               |  |               |
| <b>Summary of comparing implemented Quorn™ process and hypothetical two-stage bioprocess</b> |                                                                                                       |                               |                                 |  |               |
| <b>M1</b>                                                                                    | Percentage of accountable revenue for 2014 Quorn™ process                                             | 49%                           | <b>SUM(TOT1 to TOT10)</b>       |  |               |
|                                                                                              | Percentage of revenue for fermentation for 2014 Quorn™ process                                        | 14%                           | <b>SUM(TOT2, TOT4 to TOT10)</b> |  |               |
|                                                                                              | Percentage of revenue for profit and labor for 2014 Quorn™ process                                    | 35%                           | <b>SUM(TOT1, TOT3)</b>          |  |               |
| <b>N1</b>                                                                                    | Residual revenue percentage for PR, research, packaging, overhead, eggs, etc. for 2014 Quorn™ process | 51%                           | <b>100%-M1</b>                  |  |               |
|                                                                                              | Total accountable revenue per year for 2014 Quorn™ process                                            | 120,553,765 \$                | <b>n·N1</b>                     |  |               |
|                                                                                              | Total residual revenue per year for 2014 Quorn™ process                                               | 127,083,929 \$                | <b>n·M1</b>                     |  |               |
|                                                                                              | Glucose cost credit per year in two-stage bioprocess                                                  | -8,311,533 \$                 | <b>-L</b>                       |  |               |
|                                                                                              | Aeration cost credit per year by oxygen from electrolyzer in two-stage bioprocess                     | -763,432 \$                   | <b>-(n1-r1)</b>                 |  |               |
|                                                                                              | Additional labor cost per year in two-stage bioprocess                                                | 2,728,463 \$                  | <b>I-H</b>                      |  |               |
|                                                                                              | Additional capital cost for fermenter per year in two-stage bioprocess                                | 16,070,253 \$                 | <b>F-E</b>                      |  |               |
|                                                                                              | Additional CO <sub>2</sub> cost per year in two-                                                      | 2,544,753 \$                  | <b>A1</b>                       |  |               |

|           |                                                                                                |                |                                            |  |  |
|-----------|------------------------------------------------------------------------------------------------|----------------|--------------------------------------------|--|--|
|           | stage bioprocess                                                                               |                |                                            |  |  |
|           | Additional capital cost for electrolyzer per year in two-stage bioprocess                      | 739,447 \$     | <b>I1</b>                                  |  |  |
|           | Additional operating cost for electrolyzer per year in two-stage bioprocess                    | 5,737,817 \$   | <b>L1</b>                                  |  |  |
| <b>O1</b> | Total cost (required revenue) for two-stage bioprocess                                         | 266,892,414 \$ | SUM(all above excluding percentage values) |  |  |
|           | Overall increase in cost to produce protein in two-stage bioprocess compared to Quorn™ process | 7.57%          | <b>(O1-n)/n·100</b>                        |  |  |

## Supplementary Experimental Procedures

### Media compositions:

The 2xP7 medium was composed of mineral salts (per Liter: 2.4 g NaCl, 3 g NH<sub>4</sub>Cl, 0.3 g KCl, 0.3 g KH<sub>2</sub>PO<sub>4</sub>, 1.01 g MgCl<sub>2</sub>·6H<sub>2</sub>O, 0.16 g CaCl<sub>2</sub>·2H<sub>2</sub>O), trace elements (per Liter: 20 mg NTA, 1.32 mg MnCl<sub>2</sub>·4H<sub>2</sub>O, 8 mg (NH<sub>4</sub>)<sub>2</sub>Fe(SO<sub>4</sub>)<sub>2</sub>, 2 mg CoCl<sub>2</sub>·6H<sub>2</sub>O, 3.56 mg ZnSO<sub>4</sub>·7H<sub>2</sub>O, 0.2 mg CuCl<sub>2</sub>·2H<sub>2</sub>O, 0.2 mg NiCl<sub>2</sub>·6H<sub>2</sub>O, 0.2 mg Na<sub>2</sub>MoO<sub>4</sub>·2H<sub>2</sub>O, 0.27 mg Na<sub>2</sub>SeO<sub>3</sub>·5H<sub>2</sub>O, 0.22 mg Na<sub>2</sub>WO<sub>4</sub>·2H<sub>2</sub>O), and vitamins (per Liter: 0.1 mg pyridoxine, 0.05 mg thiamine, 0.05 mg riboflavin, 0.05 mg D-pantothenic acid hemicalcium salt, 0.05 mg thioctic acid, 0.02 mg aminobenzoic acid, 0.02 mg nicotinic acid, 0.1 mg vitamin B<sub>12</sub>, 0.05 mg biotin, 0.05 mg folic acid, 0.05 mg mesna). The vitamin B<sub>12</sub> and folate was omitted from the vitamin solution during the last 6 days of Period II and III without noticeable changes in performance. Vitamins were added after autoclaving. Oxygen was completely removed from the medium by sparging with sterile nitrogen gas, and then adding cysteine (1 mM final concentration). Antifoam (Sigma 204) was added to the feed medium for Stage A according to the following scheme: below OD<sub>600</sub> of 5, no antifoam; above OD<sub>600</sub> of 5, addition of 10 μL L<sup>-1</sup> antifoam; and above OD of 7, addition of 20 μL L<sup>-1</sup> antifoam.

The YN medium for flask experiments was composed of mineral salts (per Liter: 1 g (NH<sub>4</sub>)<sub>2</sub>SO<sub>4</sub>, 1 g KH<sub>2</sub>PO<sub>4</sub>, 1 g MgSO<sub>4</sub>·7H<sub>2</sub>O, NaCl 0.1 g, 0.033 CaCl<sub>2</sub>·2H<sub>2</sub>O), trace elements (per Liter: 5 mg Fe(II)SO<sub>4</sub>·7H<sub>2</sub>O, 1.6 mg ZnSO<sub>4</sub>·7H<sub>2</sub>O, 1.12 mg Mn(II)SO<sub>4</sub>·1H<sub>2</sub>O, 0.28 mg Na<sub>2</sub>MoO<sub>4</sub>, 0.18 mg Co(II)Cl<sub>2</sub>, 0.18 mg Cu(II)Cl<sub>2</sub>·2H<sub>2</sub>O), and vitamins (per Liter: 20 mg myo-inositol, 4.4 mg thiamine, 1.2 mg pyridoxine, 1 mg D-pantothenic acid hemicalcium salt, 0.03 mg biotin). For the YN medium for the bioprocessing experiment, the (NH<sub>4</sub>)<sub>2</sub>SO<sub>4</sub> was replaced by 0.4 g NH<sub>4</sub>Cl, and the MgSO<sub>4</sub>·7H<sub>2</sub>O was replaced by 0.82 g MgCl<sub>2</sub>·6H<sub>2</sub>O. Instead, we added 0.6 g L<sup>-1</sup> (2xYN) or 1.2 g L<sup>-1</sup> (4xYN) cysteine as the sulfur source. The by-pass feed was supplemented with antifoam (Sigma 204) according to the following scheme: 10 μL L<sup>-1</sup> in the 2xYN; 50 μL L<sup>-1</sup> in the 4xYN.

### Stage A set-up:

The pH was controlled with the internal pH controller of the Stage A unit and a pH probe (Mettler Toledo, Columbus, OH). The temperature was controlled at 35 °C with a recirculating water bath. Stirring was at 300 rpm with two vertical flat-blade impellers each with four blades. The gas was provided through a microsparger (0.5 microns, More Beer, Pittsburg, CA). The headplate was equipped with ports for pH control (5 M KOH), gas in and out, medium feed (40 mL h<sup>-1</sup>), Na<sub>2</sub>S feed, and cell recycling. The additional Na<sub>2</sub>S feed was used during continuous operation to provide an additional source of sulfur and to keep Stage A anaerobic. The Na<sub>2</sub>S feed pump was triggered with a timer (1 s on, 59 s off) resulting in a feed rate of 0.84 mL h<sup>-1</sup> with an anaerobic 1 M Na<sub>2</sub>S stock, which resulted in an apparent concentration of 2 mM Na<sub>2</sub>S per day at the 40 mL h<sup>-1</sup> medium feed rate. Cell recycling with full cell retention was performed through a Cellflo polyethersulfone hollow fiber module (cell guard) with 500-cm<sup>2</sup> membrane surface area and 0.2 μm pore size (C22E-011-01N, Spectrum Laboratories, Inc., Rancho Dominguez, CA) at 180 mL min<sup>-1</sup>.

### Stage B set-up:

The pH was controlled with an Alpha pH 800 controller (Eutech Instruments, Vernon Hills, IL) and a pH probe (Cole-Parmer, Vernon Hills, IL). The temperature was controlled at 30°C with the electric heating jacket from Stage B. Stirring was at 200 rpm with a magnetically coupled stirrer with two vertical flat-blade impellers each with six blades. Compressed air was provided through a microsparger (0.5 microns, More Beer, Pittsburg, CA) at an average flow-rate of 88.5 ± 19.6 mL min<sup>-1</sup> (n=60). The headplate was equipped with ports for pH control (2 M HCl, 2 M NaOH), gas in and out, medium feed from Stage A, and a by-pass feed for additional YN feeding.

### Analytical Procedures:

The OD<sub>600</sub> for the flask experiments was measured in a plate reader (BioTek Synergy 2, Winooski, VT). The OD<sub>600</sub> for the bioprocessing experiments was measured using a photometer (Milton Roy Spectronic 1201, Houston, TX) in a quartz glass cuvette (SCC 282, 1.000, Hellma, Müllheim, Germany). Cell dry weight (CDW) was determined by using correlation factors of 242 mg CDW OD<sup>-1</sup> L<sup>-1</sup> for *C. ljungdahlii*,<sup>24</sup> and 270 mg CDW OD<sup>-1</sup> L<sup>-1</sup> for *S. cerevisiae* as determined in this study. For calculation of carbon in biomass a factor of 0.53 (bacterial biomass composition: C<sub>5</sub>H<sub>7</sub>O<sub>2</sub>N) was used

for *C. ljungdahlii*, and a factor of 0.51 (yeast biomass composition:  $C_{100}H_{174}O_{45}N_{20}$ ) was used for *S. cerevisiae*,<sup>11</sup> considering the molecular weight for carbon of  $12\text{ g mol}^{-1}$ . Ethanol and acetate concentrations were quantified by HPLC as described before.<sup>25</sup> Inlet and outlet gas flow rates were measured with water displacement flow-meters and bubble flow meters, respectively. Gas pressure was measured with a digital pressure gauge (Cole Parmer, Vernon Hills, IL). Gas samples were collected at the inlet and the outlet of the gas lines to analyze the relative partial pressures of the gases ( $H_2/CO_2$  for Stage A;  $N_2/O_2/CO_2$  for Stage B) by GC as described before.<sup>24</sup> The oxygen and nitrogen peaks in our GC system overlapped. Therefore, the oxygen partial pressure was determined as the difference of the signal for air (78.09% nitrogen plus 20.95% oxygen) and the gas outlet, assuming that nitrogen is inert and at a constant concentration. Oxygen partial pressure in the gas outlet of Stage B was additionally determined with an electrochemical oxygen sensor that correlated the oxygen partial pressure to a potential (S101 Diffusion Sensor, Qubit Systems, Kingston, ON, Canada). The electrochemical oxygen sensor was calibrated with 100% nitrogen gas, and with compressed air. The partial pressures, the volumetric flow rates, and the gas pressure were used to determine the gas consumption and production rates.

#### **Lowry determination of proteins:**

Frozen samples were thawed at room temperature and samples were boiled for 10 min in a heating block at  $105\text{ }^{\circ}\text{C}$ . A  $2\text{ mg mL}^{-1}$  BSA standard was mixed with 10 M NaOH to give a final concentration of 1 M NaOH with  $1.8\text{ mg mL}^{-1}$  BSA. The standard was also boiled at  $105^{\circ}\text{C}$  in a heating block. Samples were either used directly or diluted further with 1 M NaOH. Standard dilutions were prepared with 1 M NaOH.  $10\text{ }\mu\text{L}$  of standards and samples were loaded into a 96-well plate (265301, Nunc MicroWell 96-Well Plates, Thermo Scientific, Waltham, MA). 100 parts of  $Na_2CO_3$  in 0.1 M NaOH were mixed with 1 part of 1%  $CuSO_4$  and 1 part of 2% NaH-tartrate (e.g.,  $10\text{ mL} + 100\text{ }\mu\text{L} + 100\text{ }\mu\text{L}$ ).  $200\text{ }\mu\text{L}$  of this mixture was added to every well. The plate was read in a plate reader (BioTek Synergy 2, Winooski, VT) at  $750\text{ nm}$ . Then  $20\text{ }\mu\text{L}$  of a mixture of 1 part water and 1 part Folin-Ciocalteu's phenol reagent was added to each well, and the plate was incubated at room temperature in the dark for 15 min. The plate was read again at  $750\text{ nm}$ , and the background (first reading) was subtracted from the measurement (second reading).



## Supplementary Results and Discussion

### S1. Operating Stage B with *S. cerevisiae* during Period I to test for nutrient limitations and a feasible dilution rate

Only a few studies have been published with acetate as a substrate for SCP production. Goldberg *et al.*<sup>26</sup> and Verduyn *et al.*<sup>27</sup> reported growth of *S. cerevisiae* (CBS 8066) and *Candida utilis* (CBS 621; fodder yeast), respectively, in a continuously fed bioreactor without a cell guard (chemostat), while feeding a 125-mM acetate solution as the sole carbon source. Nevertheless, we performed a flask experiment to observe growth for *S. cerevisiae* under our conditions with: **1)** a 150-mM acetate concentration in YNA medium (**Figure S2**); and **2)** an acetate-rich effluent that we had obtained from a gas fermenter with *C. ljungdahliae* (**Figure S2**), which had been producing acetate concentrations of 70 mM from hydrogen and carbon dioxide (H<sub>2</sub>:CO<sub>2</sub>, 80:20 vol-%) during an experiment similar to Richter *et al.*<sup>28</sup>

We found that for the YNA medium, 53% of the acetate remained, while this was 88% for the gas-fermentation effluent (**Figure S2C**). Since for both growth media the exponential phase of the growth curve had ended (**Figure S2A**), the presence of ample substrate indicated to us that one or more unknown nutrients had been limiting the growth of *S. cerevisiae*. Obviously, future studies would need to identify the growth-limiting nutrients to minimize unnecessary medium and nutrient usage.

Next, we used Period I to learn about bioprocessing of *S. cerevisiae* in Stage B with a filtered, acetate-rich Stage-A solution and a bypass of fresh medium without yeast extract. Unlike for the flask experiment (**Figure S2C**), the initial acetate concentration of 95 mM was completely diminished during the batch-mode operating condition for the first 5 days of the operating period for Stage B (**Figure S3**). Similarly, for all continuous-mode conditions the acetate was consumed efficiently with little residual acetate concentrations left in Stage B (**Figure S3**). Thus, with a bypass of fresh medium, growth nutrients were no longer limiting yeast growth.

An important bioprocessing parameter to determine is the dilution rate for maintaining high enough concentrations of cells. We had switched to continuous mode with an initial dilution rate of 0.04 h<sup>-1</sup> on Day 25 of the operating period (**Figure 3**), which was similar to the dilution rate of Stage A. Without a cell guard, the performance at this dilution rate was stable, indicating that the growth rate could keep up with the dilution rate. To increase the yeast-protein production rate by providing more acetate and nutrients, the dilution rate was doubled to 0.08 h<sup>-1</sup>. However, the growth rate was not sufficiently high enough, which ultimately led to a complete wash-out of the yeast cells during Period I (**Figure 3A**), although we had observed a growth rate of 0.09 h<sup>-1</sup> in the flask experiment (**Figure S2B**). Verduyn *et al.*<sup>27</sup>, on the other hand, was able to achieve a dilution rate of 0.1 h<sup>-1</sup> for an aerobic *S. cerevisiae* (CBS 8066) culture with acetate as the sole carbon substrate and without yeast extract. In our case and with a different *S. cerevisiae* strain, we decided to use a lower dilution rate of 0.06 h<sup>-1</sup> during the last 12 days of both Periods II and III for Stage B (**Figure 3**).

### S2. Determining the protein mass-fraction of the yeast biomass

The average protein mass-fraction for *S. cerevisiae* was 40.2% ± 3.65% (n=16) and 53.3% ± 4.32% (n=9) during Period II and 43.7% ± 5.95% (n=15) and 56.5% ± 2.44% (n=7) during Period III for the Lowry method and Dumas method, respectively (g g<sup>-1</sup> in **Table S1**). In another study, Verduyn *et al.*<sup>27</sup> measured a 47% protein mass-fraction (g g<sup>-1</sup>) for *S. cerevisiae* CBS 8066 when grown aerobically with acetate and without yeast extract (by using a modified Biuret method). The protein mass-fraction during Period III was slightly higher than during Period II for *S. cerevisiae* by both methods in our study. This relatively high protein mass-fraction agrees with the relatively low crude-fat (lipid) mass-fraction during Period II (0.59% ± 0.22% [n=9]), and during Period III (1.07% ± 0.35% [n=7]), with ash values of 13.6% ± 1.14% (n=9) and 14.2% ± 0.76% (n=7) for Period II and Period III, respectively (all g g<sup>-1</sup>). The remaining ~30% likely consisted of mainly fiber and nucleic acids, but this would need to be confirmed during future research.

## Supplementary References

1. T. Finnigan, L. Needham and C. Abbott, in *Sustainable protein sources*, Elsevier, 2017, pp. 305-325.
2. M. G. Wiebe, *Appl. Microbiol. Biotechnol.*, 2002, **58**, 421-427.
3. Reuters, <https://www.reuters.com/article/quorn-ma-idUSL5N1204C720151001>, (accessed 19/06/2019).
4. X-Rates, <https://www.x-rates.com/average/?from=GBP&to=USD&amount=1&year=2014>, (accessed 19/06/2019).
5. I. o. Medicine, *Dietary Reference Intakes for Energy, Carbohydrate, Fiber, Fat, Fatty Acids, Cholesterol, Protein, and Amino Acids*, The National Academies Press, Washington, DC, 2005.
6. G. D. R. David Moore, and Anthony P. J. Trinci, 21st Century Guidebook to Fungi, [http://www.davidmoore.org.uk/21st\\_Century\\_Guidebook\\_to\\_Fungi\\_PLATINUM/Ch17\\_18.htm](http://www.davidmoore.org.uk/21st_Century_Guidebook_to_Fungi_PLATINUM/Ch17_18.htm), (accessed 19/06/2019).
7. O. D. F. A. LLC, <http://www.in2013dollars.com/1997-GBP-in-2014?amount=100>, (accessed 19/06/19).
8. WaccExpert, <http://www.waccexpert.com/>, (accessed 19/06/2019).
9. R. B. Ltd., <https://recruitmentbuzz.co.uk/average-wage-uk-salary-earning-age/>, (accessed 23/07/2019).
10. IndexMundi, <https://www.indexmundi.com/commodities/?commodity=sugar&months=120>, (accessed 19/06/2019).
11. C. M. Drapcho, N. P. Nhuan and T. H. Walker, *Biofuels engineering process technology*, McGraw-Hill New York, NY, USA, 2008.
12. L. Intratec Solutions, <https://www.intratec.us/chemical-markets/ammonia-price>, (accessed 19/06/2019).
13. CMR, <https://www.icis.com/explore/resources/news/1998/11/09/89463/biotin-prices-stabilize-after-months-of-decline/>, (accessed 19/06/2019).
14. I. Ltd., <https://www.inoxia.co.uk/products/chemicals/inorganic-compounds/magnesium-carbonate>, (accessed 19/06/2019).
15. M. T. Agler, M. L. Garcia, E. S. Lee, M. Schlicher and L. T. Angenent, *Environ. Sci. Technol.*, 2008, **42**, 6723-6729.
16. BusinessElectricityPrices, <https://www.businesselectricityprices.org.uk/water-prices/>, (accessed 19/06/2019).
17. D. Humbird, R. Davis and J. D. McMillan, *Biochem. Eng. J.*, 2017, **127**, 161-166.
18. J. Drewnowski, A. Remiszewska-Skwarek, S. Duda and G. Łagód, *Processes*, 2019, **7**, 311.
19. Ofgem, <https://www.ofgem.gov.uk/data-portal/all-charts/policy-area/electricity-wholesale-markets>, (accessed 19/06/2019).
20. B. Digest, <http://www.biofuelsdigest.com/bdigest/2014/10/27/liquid-co2-or-liquid-gold-maybe-both-as-aemetis-adds-co2-liquefaction-at-its-keyes-ca-plant/>, (accessed 25/07/2019).
21. E. E. Limited, *Shipping CO<sub>2</sub> – UK Cost Estimation Study*, Business, Energy & Industrial Strategy Department, 2018.
22. H. Richter, B. Molitor, H. Wei, W. Chen, L. Aristilde and L. T. Angenent, *Energy Environ. Sci.*, 2016, **9**, 2392-2399.
23. GeneratePress, <https://www.h2-international.com/2017/09/01/electrolyzer-target-100-megawatts/>, (accessed 24/07/2019).
24. J. M. Perez, H. Richter, S. E. Loftus and L. T. Angenent, *Biotechnol. Bioeng.*, 2013, **110**, 1066-1077.
25. H. Richter, B. Molitor, M. Diender, D. Z. Sousa and L. T. Angenent, *Front. Microbiol.*, 2016, **7**, 1773.
26. I. Goldberg, *Single Cell Protein*, M.I.T. Press, 1985.
27. C. Verduyn, A. H. Stouthamer, W. A. Scheffers and J. P. van Dijken, *Antonie Van Leeuwenhoek*, 1991, **59**, 49-63.
28. H. Richter, M. Martin and L. Angenent, *Energies*, 2013, **6**, 3987-4000.
